# Supplementary material
Source: PubMed Central journal article supplement (PMC8077238)
Supplement: joces-134-254458-s1.pdf [file joces-134-254458-s1.pdf]

**Table S1.** RNA-seq dataset of transcriptomes of *Lbh*-null and wildtype outer hair cells.

[Click here to Download Table S1](#)

**Table S2:** Differentially expressed genes between *Lbh*-null and wildtype OHCs.

[Click here to Download Table S2](#)

**Table S3:** Significantly enriched genes associated with Wnt and Notch signaling.

[Click here to Download Table S3](#)

**Table S4:** Significantly enriched genes associated with cell cycle and transcription

[Click here to Download Table S4](#)

**Table S5:** Significantly enriched genes associated with DNA damage/repair and autophagy.

[Click here to Download Table S5](#)
